# Supplementary material for: Electronic and Geometric Structures of Paramagnetic Diazadiene Complexes of Lithium and Sodium
Source: PubMed Central journal article supplement — ChemistryOpen. 2018 Sep 5;7(9):701–8. doi: 10.1002/open.201800114 (PMC6123648; doi:10.1002/open.201800114), 2018-09-05
Supplement: OPEN-7-701-s001.pdf [file OPEN-7-701-s001.pdf]

## Supporting Information

### List of Figures:

**Figure S1.** X-band CW EPR of Na-DAD complex in THF, recorded at different temperatures.

**Figure S2.** The same as FigureS1, but with a long range scan.

**Figure S3.** Q-band CW EPR of Na-DAD complex in THF, recorded at different temperatures.

**FigureS4.**Q-band CW room temperature of Na-DAD and its simulation.

**Figure S5.** Experimental and simulated ESE of Li-DAD in Toluene.

**Figure S6.** Experimental and simulated ESE of Li-DAD in THF.

**FigureS7.** Inversion recovery (IR) trace for Li-DAD in THF.

**FigureS8.** LiDAD in THF; Field swept spectra recorded before and after applying filter time  $T_f$ .

**FigureS9.** Inversion recovery (IR) trace for Na-DAD in THF.

**Figure S10.** Experimental and simulated ESE of Na-DAD in THF.

**Figure S11.**Time trace and magnitude spectra of REFINE for Li-DAD in THF.

**Figure S12.**Time trace and magnitude spectra of REFINE for Na-DAD in THF.

**TableS1.** Coordinates of the gas phase optimized Li-DAD complex.

**TableS2.** Coordinates of the gas phase optimized Na-DAD complex

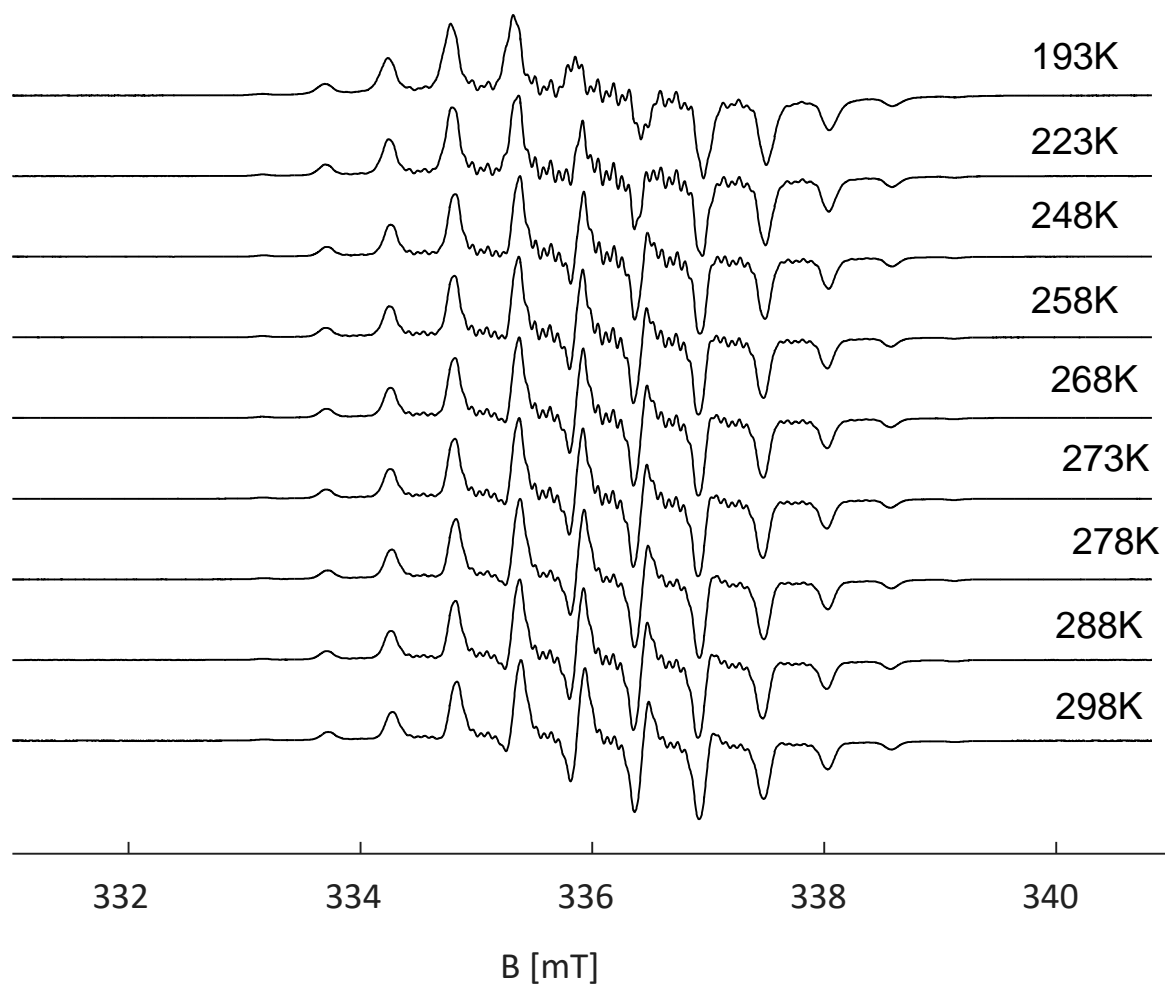

**Figure S1.** X-band CW EPR of Na-DAD complex in THF, recorded at different temperatures.

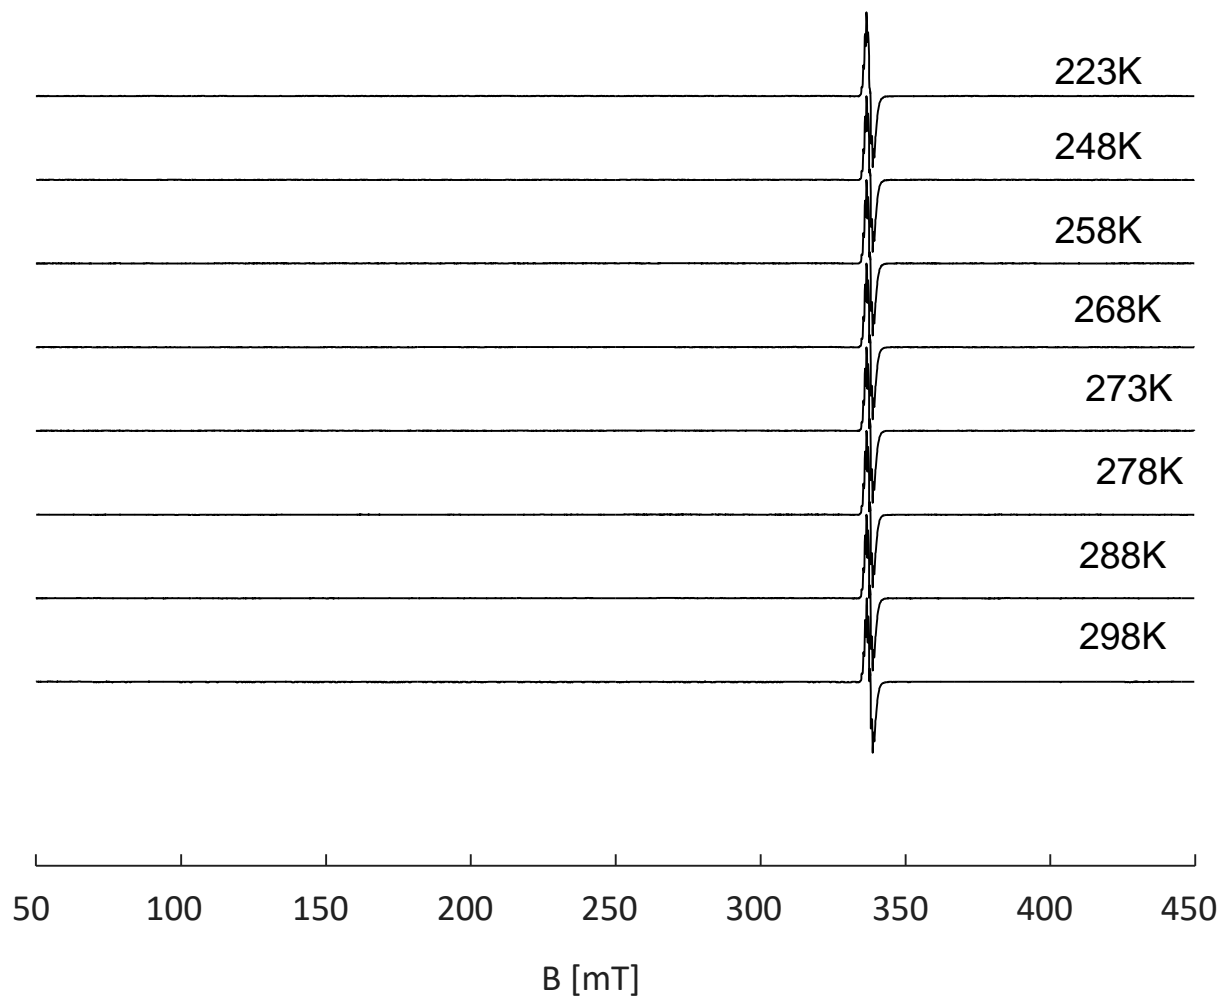

**Figure S2.** The same as FigureS1, but with a long range scan. There is no transition at half field position ( $\sim 170$ mT), discarding a singlet to triplet electronic transition.

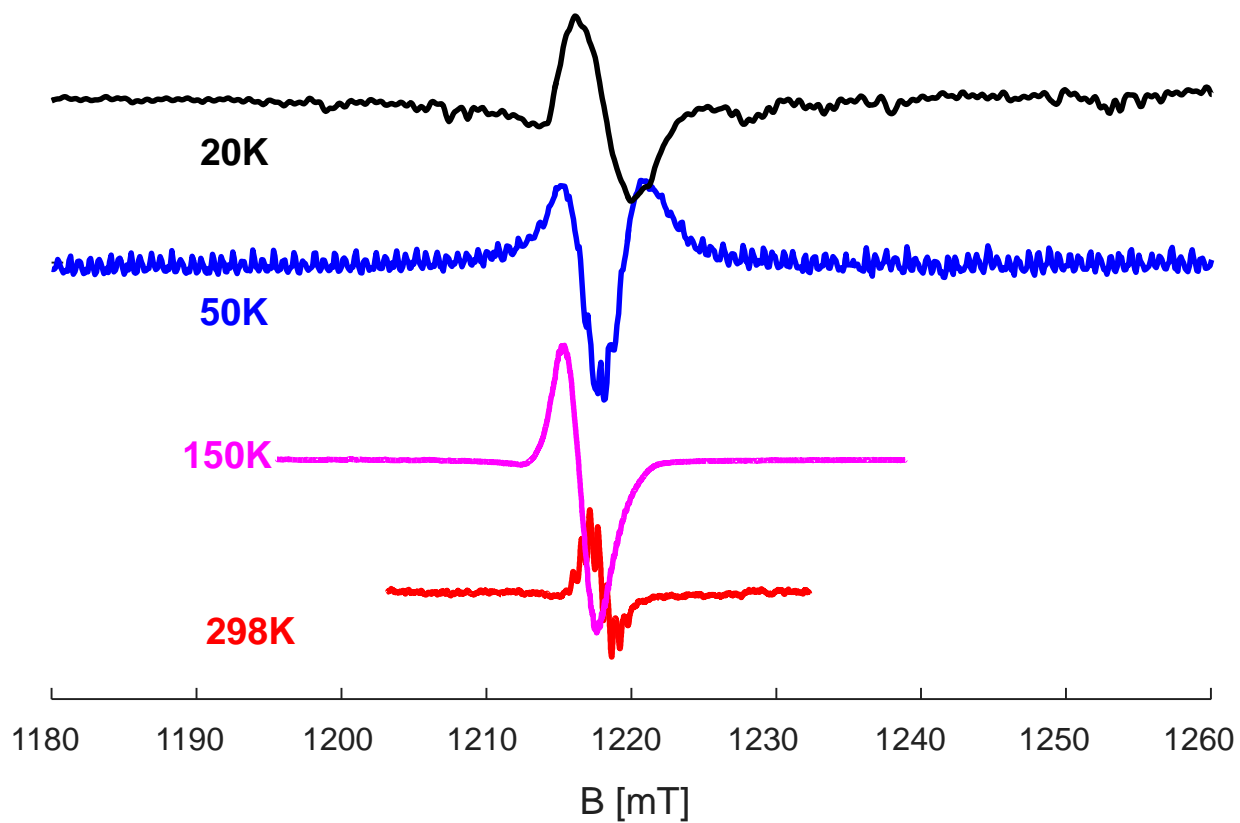

**Figure S3.** CW EPR temperature series of NaDAD complex (dissolved in THF) recorded at 34GHz at 1mW of microwave power and 0.7mT of modulation amplitude.

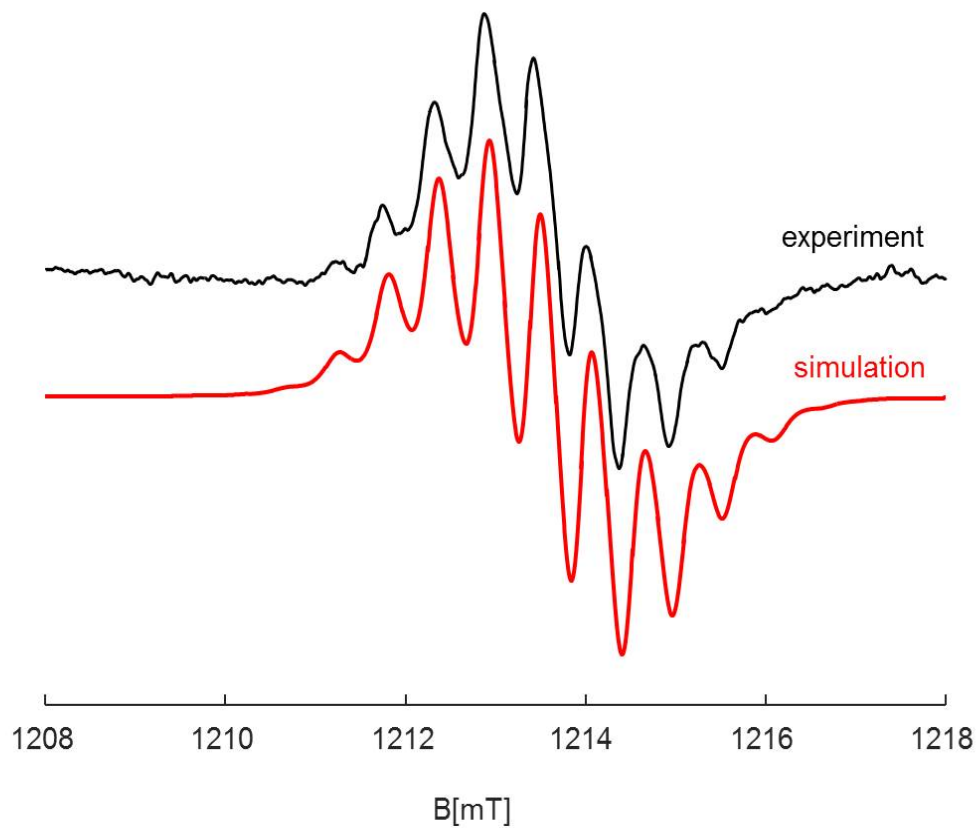

**FigureS4.** Q-band CW room temperature of Na-DAD THF ( in black) is simulated (in red) at 33.9GHz with  $a_{\text{iso}}(^{14}\text{N})=0.53\text{mT}(\#2)$  ,  $a_{\text{iso}}(^{1}\text{H})=0.57$  ,  $0.55\text{mT}(\#2, \#4)$  and  $a_{\text{iso}}(^{23}\text{Na})=0.1\text{mT}$  at  $g=[2.0078 \ 2.0061 \ 2.0023]$ .

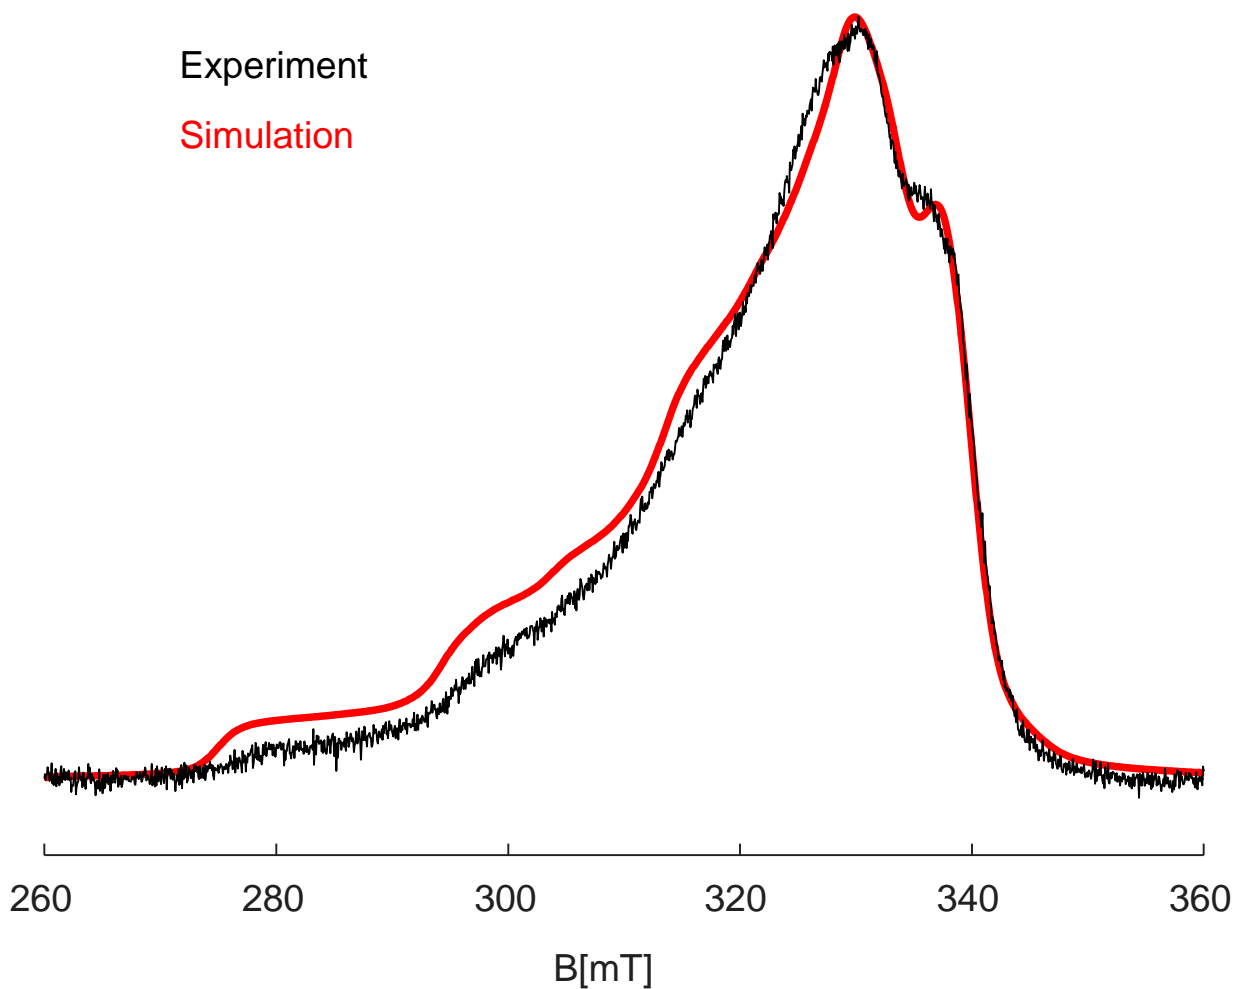

**Figure S5.** Experimental (black) and simulated (red) ESE of Li-DAD in Toluene at 20K at 9.4GHz frequency. Lithium nucleus shows anisotropic hyperfine coupling of  $A(^{6,7}\text{Li})=[21 \ 1.7 \ 0.3]\text{mT}$  and two equivalent nitrogens with  $a_{\text{iso}}(^{14}\text{N})=2.5\text{mT}$  at  $g=[2.192 \ 2.026 \ 1.997]$ .

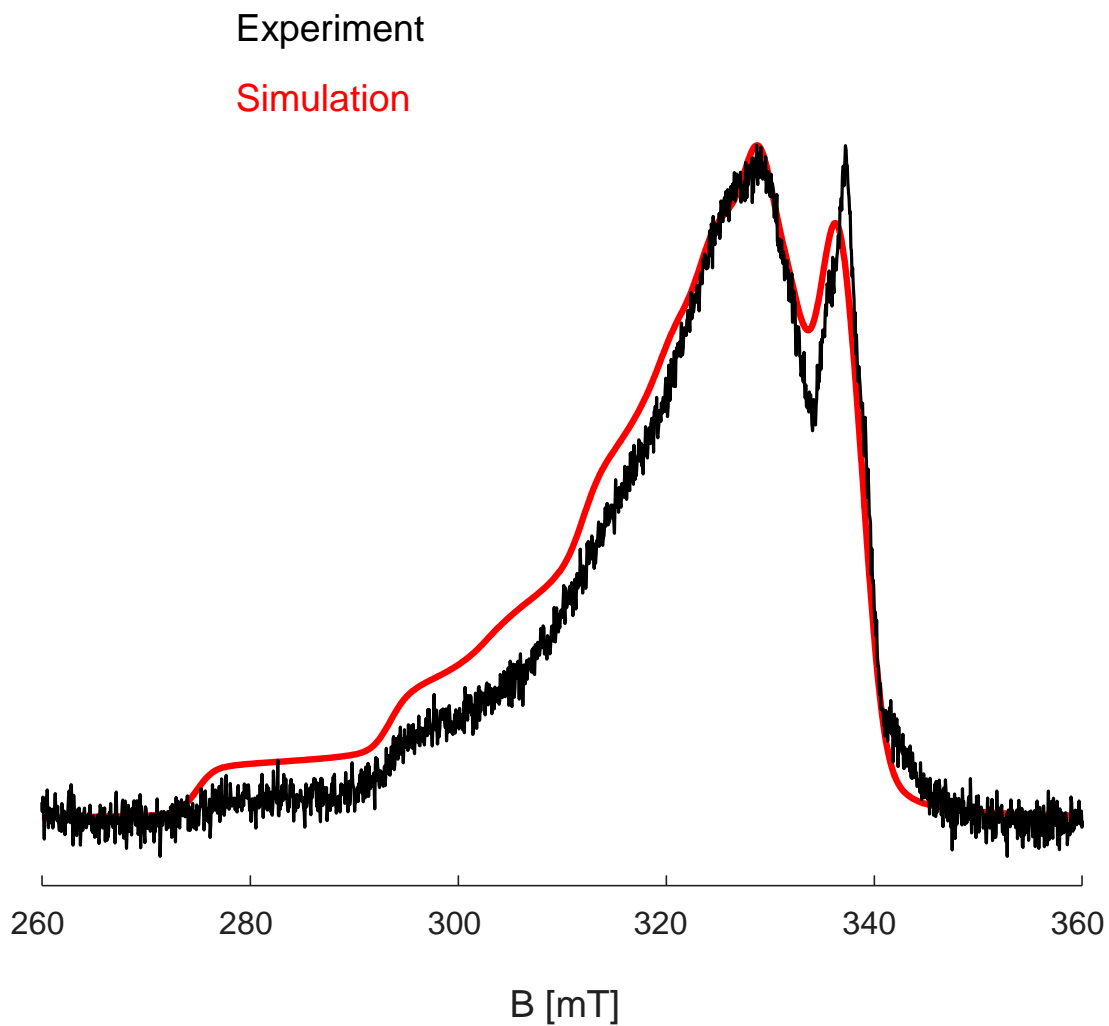

**Figure S6.** Experimental (black) and simulated (red) ESE of Li-DAD in THF at 30K at 9.4GHz frequency.  $A(^{6,7}\text{Li})=[20.3\ 4.2\ 2.8]$ ,  $A(^{14}\text{N})=[2.5\ 1.0\ 0.3]$  at  $g=[2.192\ 2.026\ 1.997]$ . Hyperfine couplings are given in mT.



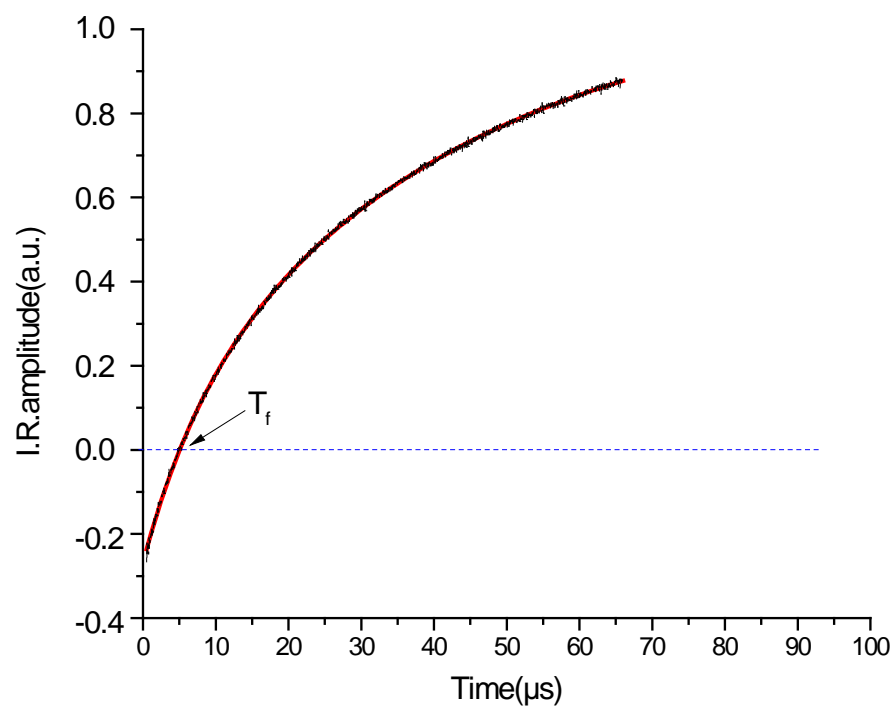

**FigureS7.** Inversion recovery (IR) trace (black) and its fit (red) recorded for Li-DAD complex dissolved in THF at 20K.

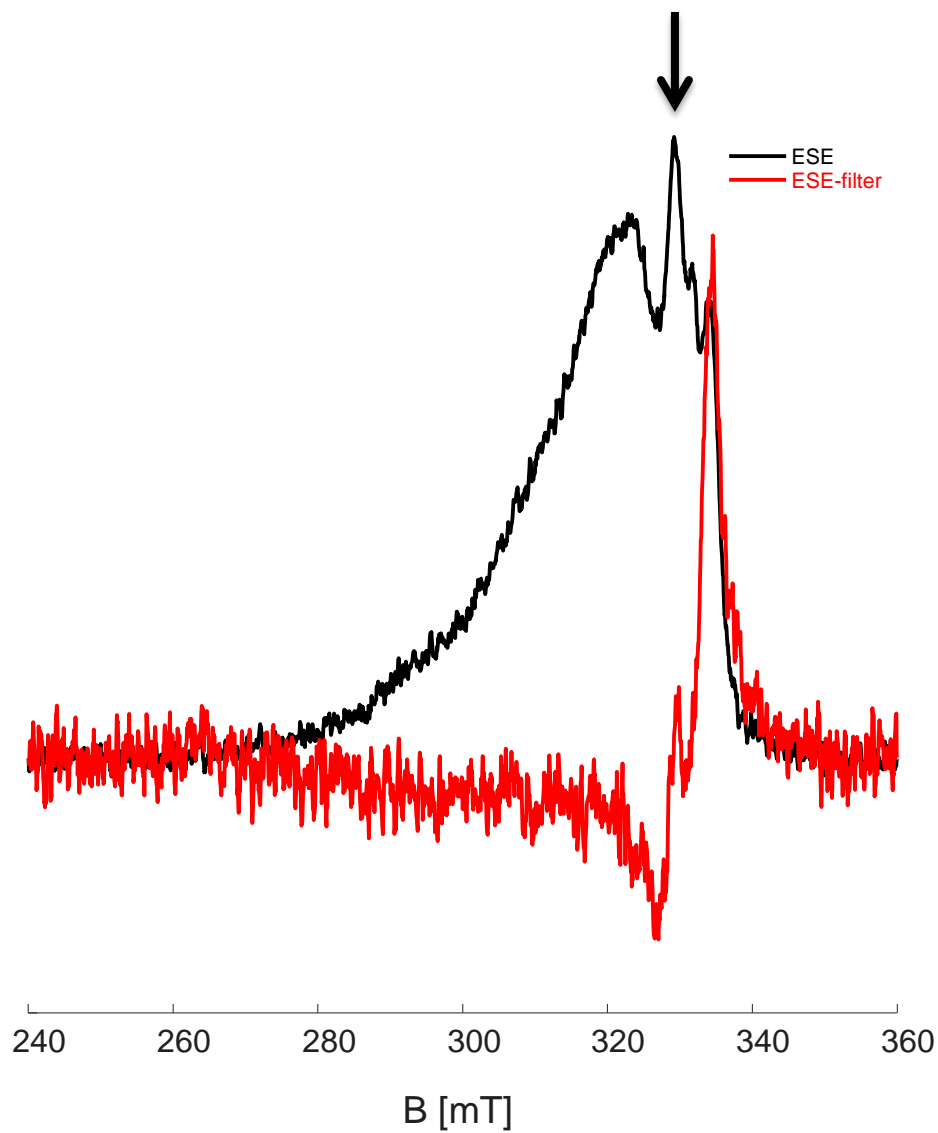

**FigureS8.** Field swept spectra of LiDAD dissolved in THF, recorded before (black) and after (red) applying filter time  $T_f$ . The arrow shows the field position for IR trace. All measurements were done at 20K.

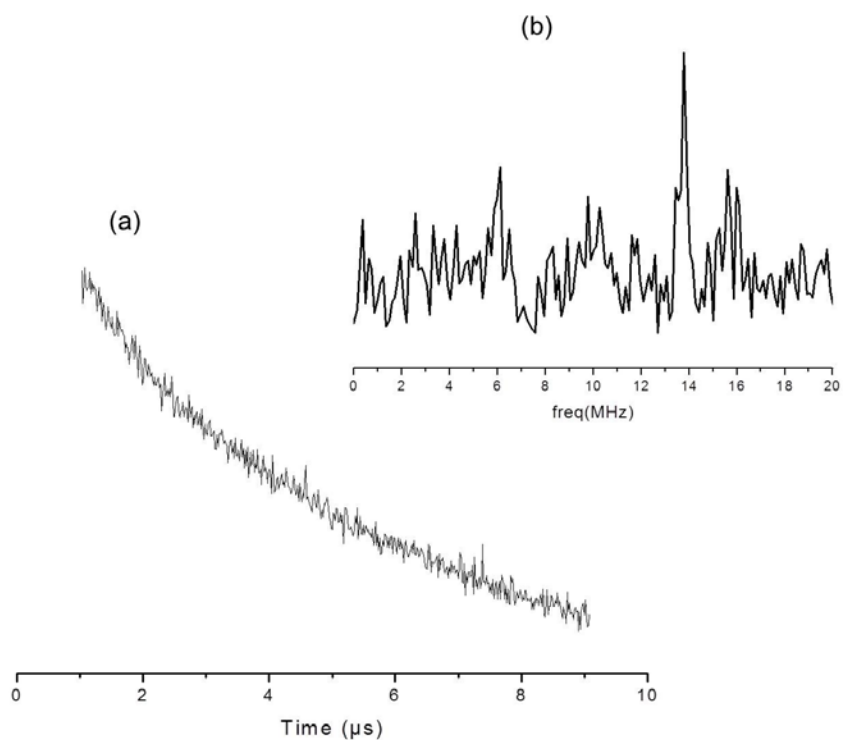

**Figure S9.** Time trace and magnitude spectra of REFINE for Li-DAD in THF at maximum field of 322.8mT. Peaks at 6.1 and 13.79MHz could be detected which are in accordance with nuclear Larmor frequency of  ${}^6,7\text{Li}$  and  ${}^1\text{H}$  at resonance field.

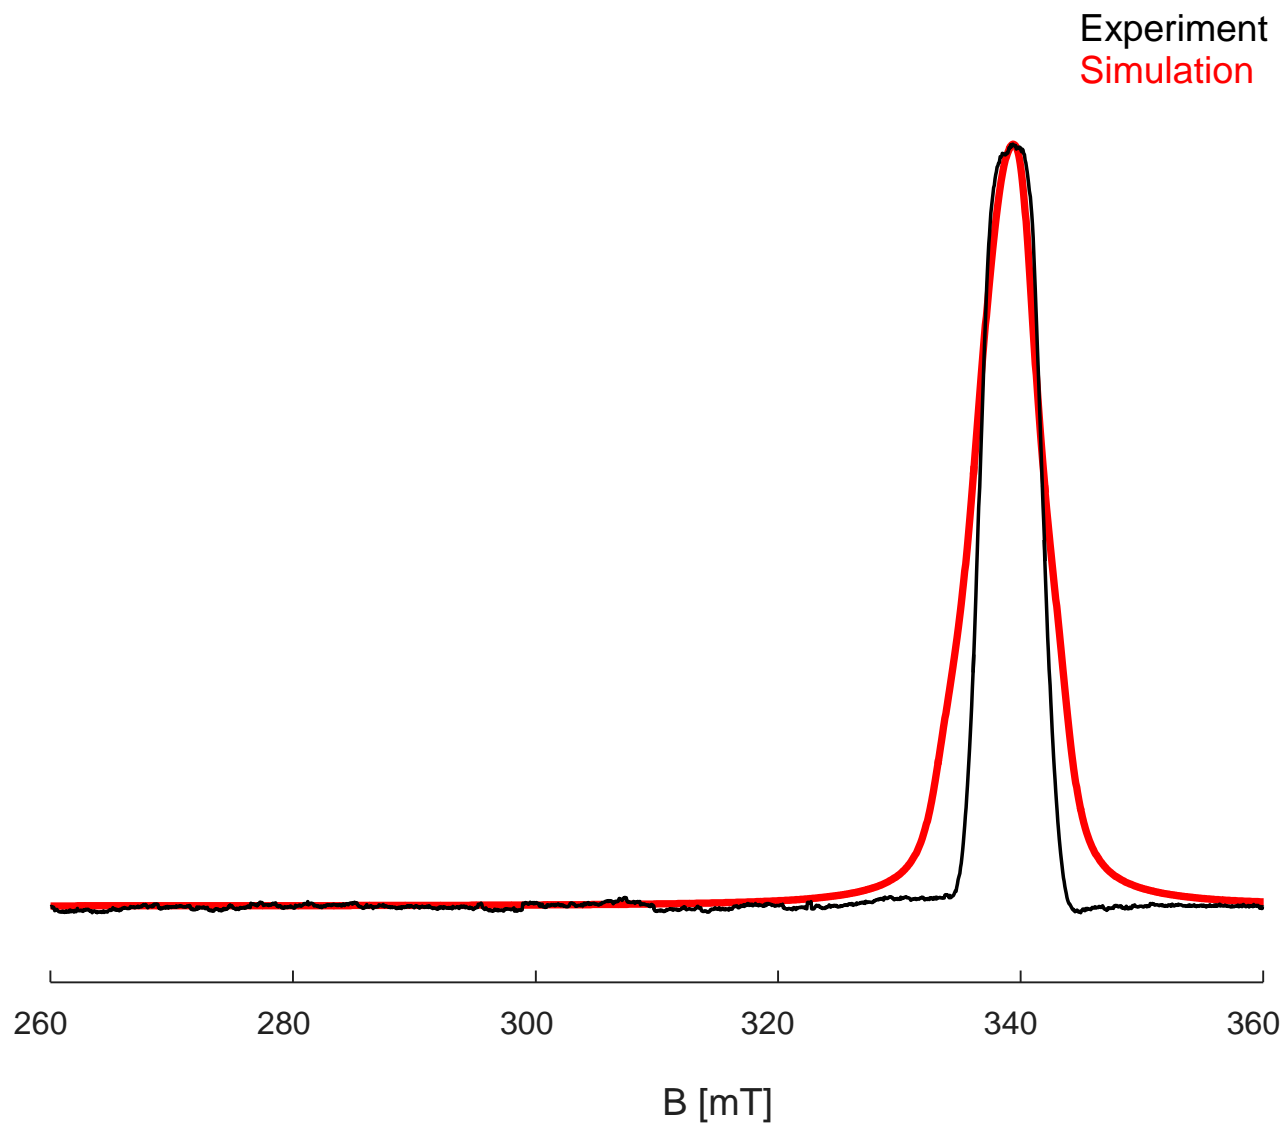

**FigureS10.** Experimental (black) and simulated (red) ESE of Na-DAD in THF at 20K at 9.4GHz frequency.  $A(^{23}\text{Na})=[3.5\ 1.7\ 0.3]$ ,  $A(^{14}\text{N})=[2.5\ 1.0\ 0.35]$  at  $g=[2.0089\ 2.0064,\ 2.0025]$ . Hyperfine couplings are given in mT.

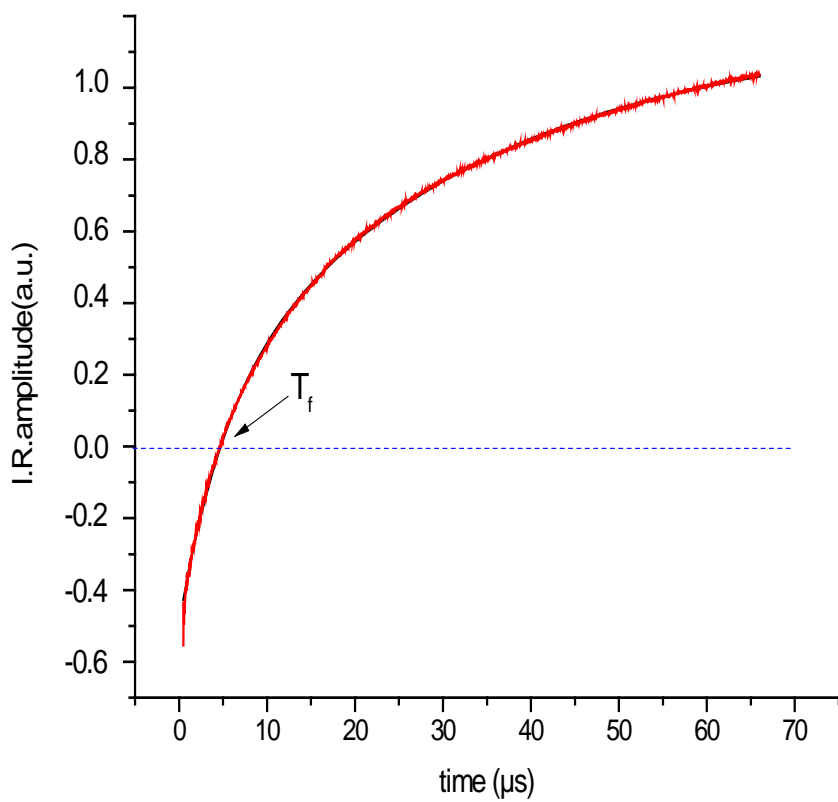

**FigureS11.** Inversion recovery (IR) trace (black) and its fit (red) recorded for Na-DAD complex at 20K.

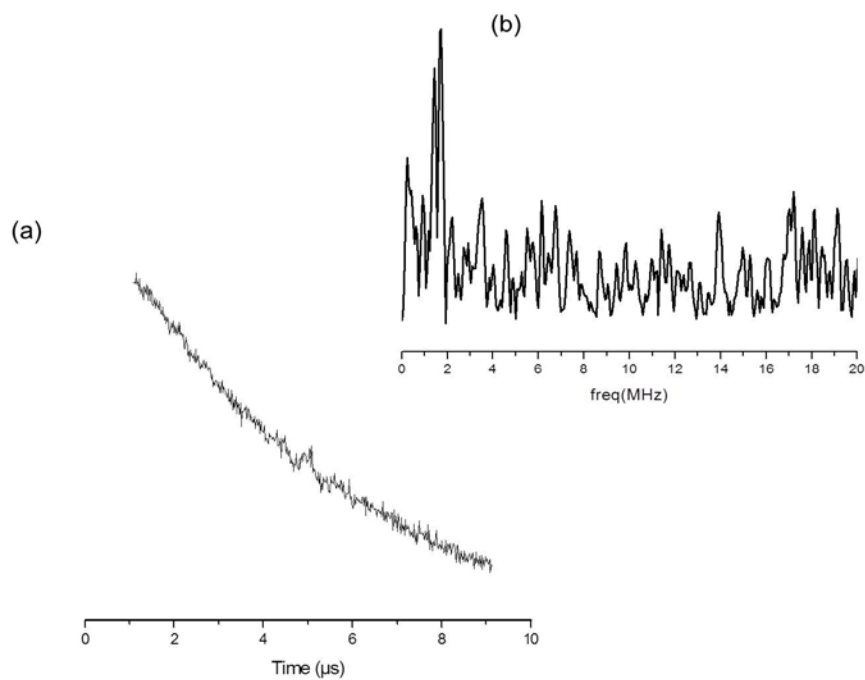

**Figure S12.** Time trace and magnitude spectra of REFINE for Na-DAD in THF at maximum field of 331.8mT, peaks at 1.73, 3.52 and 13.92MHz could be detected which are close to the nuclear Larmor frequency of  $^{14}\text{N}$ ,  $^{23}\text{Na}$  and  $^1\text{H}$  at resonance field.

**TableS1.** Coordinates of the gas phase optimized Li-DAD complex.

|    |           |           |           |   |           |           |           |
|----|-----------|-----------|-----------|---|-----------|-----------|-----------|
| C  | -1.226325 | 0.730622  | -0.571145 | C | 0.129481  | -2.728407 | -0.482316 |
| C  | -2.491151 | 1.460823  | -0.966680 | C | -0.338883 | -3.588644 | 0.545410  |
| H  | -3.390338 | 0.947123  | -0.586983 | C | -0.069644 | -4.960080 | 0.456063  |
| H  | -2.606079 | 1.529983  | -2.064370 | H | -0.422622 | -5.628412 | 1.244662  |
| H  | -2.490704 | 2.484474  | -0.568963 | C | 0.643313  | -5.492465 | -0.614757 |
| C  | -0.139068 | 2.754347  | 0.209446  | H | 0.846273  | -6.564359 | -0.663490 |
| C  | 0.105151  | 3.659059  | -0.857084 | C | 1.099190  | -4.644395 | -1.620647 |
| C  | 0.240088  | 5.023614  | -0.567939 | H | 1.659515  | -5.064945 | -2.458705 |
| H  | 0.437612  | 5.726111  | -1.380676 | C | 0.852812  | -3.266879 | -1.579407 |
| C  | 0.139341  | 5.505783  | 0.733583  | C | -1.092715 | -3.045583 | 1.756799  |
| H  | 0.248189  | 6.573316  | 0.936070  | H | -1.237131 | -1.968069 | 1.596357  |
| C  | -0.092752 | 4.613295  | 1.778054  | C | -2.488139 | -3.674940 | 1.909732  |
| H  | -0.167520 | 4.996519  | 2.797018  | H | -3.031462 | -3.209567 | 2.750381  |
| C  | 0.303306  | 3.169290  | -2.289300 | H | -2.428302 | -4.758388 | 2.111311  |
| H  | 0.012253  | 2.110944  | -2.322147 | H | -3.088665 | -3.536514 | 0.995759  |
| C  | -0.574262 | 3.915229  | -3.307784 | C | -0.272310 | -3.205722 | 3.049603  |
| H  | -0.461651 | 3.468824  | -4.311048 | H | -0.804069 | -2.759029 | 3.907763  |
| H  | -0.297935 | 4.980298  | -3.390000 | H | 0.709507  | -2.710805 | 2.962584  |
| H  | -1.640038 | 3.865938  | -3.029462 | H | -0.088607 | -4.268243 | 3.283932  |
| C  | 1.788699  | 3.236667  | -2.688990 | C | 1.388657  | -2.363977 | -2.686339 |
| H  | 1.940156  | 2.833769  | -3.705876 | H | 0.943590  | -1.370228 | -2.537696 |
| H  | 2.413411  | 2.650938  | -1.994053 | C | 2.916125  | -2.203287 | -2.580891 |
| H  | 2.161217  | 4.275632  | -2.678557 | H | 3.294215  | -1.507266 | -3.350043 |
| Li | 1.109967  | 0.010039  | 0.385643  | H | 3.431026  | -3.170351 | -2.714459 |
| N  | -0.177582 | 1.358319  | -0.000732 | H | 3.210936  | -1.810488 | -1.592210 |
| C  | -1.140238 | -0.687094 | -0.772225 | C | 0.983831  | -2.838112 | -4.091891 |
| C  | -2.293983 | -1.415415 | -1.426209 | H | 1.312784  | -2.109525 | -4.852802 |
| H  | -2.662647 | -0.878022 | -2.314957 | H | -0.110058 | -2.949414 | -4.174547 |

**TableS1.Contd.**

|   |           |           |           |
|---|-----------|-----------|-----------|
| N | -0.024434 | -1.325533 | -0.364882 |
| C | -0.233876 | 3.241971  | 1.542184  |
| C | 0.917908  | 1.797584  | 3.261278  |
| H | 0.783583  | 1.030651  | 4.044067  |
| H | 1.560830  | 1.369429  | 2.468730  |
| H | 1.477098  | 2.642598  | 3.699341  |
| C | -1.325237 | 2.806726  | 3.828394  |
| H | -0.842352 | 3.630976  | 4.380120  |
| H | -2.286019 | 3.178539  | 3.437796  |
| H | -1.539589 | 2.007425  | 4.558279  |
| C | -0.438275 | 2.266174  | 2.697667  |
| H | -0.941190 | 1.380353  | 2.282810  |



**TableS2.** Coordinates of the gas phase optimized Na-DAD complex.

|   |           |          |           |    |           |           |           |
|---|-----------|----------|-----------|----|-----------|-----------|-----------|
| C | 0.026056  | 0.717398 | 1.147627  | C  | -3.171199 | 2.882618  | -1.501333 |
| C | 0.043810  | 1.440152 | 2.481463  | H  | -4.131672 | 2.340002  | -1.459423 |
| H | 0.828235  | 1.051693 | 3.153616  | H  | -2.546161 | 2.406473  | -2.277975 |
| H | -0.915957 | 1.329335 | 3.020073  | H  | -3.379680 | 3.913359  | -1.835653 |
| H | 0.221393  | 2.515207 | 2.341125  | N  | 0.044515  | 1.391587  | -0.016726 |
| C | 0.095011  | 2.799383 | -0.080550 | Na | -0.000005 | 0.000001  | -1.767957 |
| C | 1.347785  | 3.466994 | -0.159117 | C  | -0.026051 | -0.717398 | 1.147627  |
| C | 1.371274  | 4.851600 | -0.364085 | C  | -0.043799 | -1.440153 | 2.481463  |
| H | 2.332192  | 5.367282 | -0.429950 | H  | -0.828223 | -1.051695 | 3.153618  |
| C | 0.195625  | 5.588369 | -0.485962 | H  | 0.915969  | -1.329336 | 3.020069  |
| H | 0.235264  | 6.667414 | -0.648915 | H  | -0.221382 | -2.515209 | 2.341124  |
| C | -1.030202 | 4.933174 | -0.400414 | C  | -0.095011 | -2.799383 | -0.080552 |
| H | -1.951773 | 5.511814 | -0.496311 | C  | -1.347787 | -3.466992 | -0.159119 |
| C | -1.106248 | 3.550570 | -0.195025 | C  | -1.371277 | -4.851598 | -0.364087 |
| C | 2.658367  | 2.691283 | -0.058942 | H  | -2.332197 | -5.367279 | -0.429953 |
| H | 2.403144  | 1.658159 | 0.214258  | C  | -0.195630 | -5.588368 | -0.485965 |
| C | 3.587610  | 3.236044 | 1.038373  | H  | -0.235269 | -6.667413 | -0.648918 |
| H | 4.479291  | 2.594393 | 1.143077  | C  | 1.030198  | -4.933175 | -0.400417 |
| H | 3.073334  | 3.267959 | 2.013266  | H  | 1.951768  | -5.511815 | -0.496313 |
| H | 3.938801  | 4.257315 | 0.811920  | C  | 1.106246  | -3.550570 | -0.195027 |
| C | 3.383900  | 2.636699 | -1.416098 | C  | -2.658368 | -2.691279 | -0.058943 |
| H | 4.301632  | 2.026764 | -1.348579 | H  | -2.403143 | -1.658156 | 0.214257  |
| H | 3.672485  | 3.644712 | -1.760140 | C  | -3.587611 | -3.236040 | 1.038372  |
| H | 2.739295  | 2.195309 | -2.197115 | H  | -4.479291 | -2.594388 | 1.143077  |
| C | -2.468523 | 2.865800 | -0.131250 | H  | -3.073334 | -3.267957 | 2.013265  |
| H | -2.288588 | 1.813377 | 0.129872  | H  | -3.938804 | -4.257310 | 0.811918  |
| C | -3.377182 | 3.456728 | 0.959395  | C  | -3.383901 | -2.636693 | -1.416098 |
| H | -4.316754 | 2.882592 | 1.032562  | H  | -4.301632 | -2.026757 | -1.348579 |
| H | -3.645861 | 4.506040 | 0.748609  | H  | -3.672488 | -3.644706 | -1.760142 |

**TableS2.** Contd.

|   |           |           |           |
|---|-----------|-----------|-----------|
| C | 2.468522  | -2.865803 | -0.131251 |
| H | 2.288588  | -1.813379 | 0.129865  |
| C | 3.377176  | -3.456728 | 0.959399  |
| H | 4.316750  | -2.882594 | 1.032565  |
| H | 3.645853  | -4.506041 | 0.748619  |
| H | 2.882150  | -3.429734 | 1.944305  |
| C | 3.171202  | -2.882630 | -1.501332 |
| H | 4.131676  | -2.340014 | -1.459422 |
| H | 2.546168  | -2.406488 | -2.277979 |
| H | 3.379683  | -3.913373 | -1.835647 |
| N | -0.044515 | -1.391586 | -0.016726 |
